# Supplementary material
Source: PubMed Central journal article supplement (PMC5483518)
Supplement: rstb20160216supp1.pdf [file rstb20160216supp1.pdf]

## Supplementary Information

# **Hemolytic actinoporins interact with carbohydrates using their lipid-binding module.**

Koji Tanaka<sup>1</sup>, Jose M.M. Caaveiro<sup>2,\*</sup>, Koldo Morante<sup>2</sup>, and Kouhei Tsumoto<sup>1,2,3,\*</sup>

<sup>1</sup>*Department of Chemistry and Biotechnology, School of Engineering, The University of Tokyo, Bunkyo-ku, Tokyo 113-8656, Japan,* <sup>2</sup>*Department of Bioengineering, School of Engineering, The University of Tokyo, Bunkyo-ku, Tokyo, 113-8656, Japan,* <sup>3</sup>*The Institute of Medical Science, The University of Tokyo, Minato-ku, Tokyo, 108-8639, Japan.*

Corresponding author: JMMC, Email jose@protein.t.u-tokyo.ac.jp

Corresponding author: KT, Email tsumoto@bioeng.t.u-tokyo.ac.jp

Footnote.

Current address of JMMC: Graduate School of Pharmaceutical Sciences, Kyushu University, 3-1-1 Maidashi, Higashi-Ku, Fukuoka, 812-8582, Japan.

**Table S1.** Structural homology of FraC ([http://ekhidna.biocenter.helsinki.fi/dali\\_server/start](http://ekhidna.biocenter.helsinki.fi/dali_server/start)).

| PDB ID              | Protein                              | Class  | Z score | RMSD | No. res. <sup>[a]</sup> | No. ali. <sup>[b]</sup> | %id <sup>[c]</sup> |
|---------------------|--------------------------------------|--------|---------|------|-------------------------|-------------------------|--------------------|
| 3vwi                | Fragaceatoxin C                      | PFT    | 38.2    | 0.2  | 177                     | 177                     | 100                |
| 1iaz                | Equinatoxin II                       | PFT    | 35.4    | 0.4  | 175                     | 174                     | 90                 |
| 1gwy                | Sticholysin II                       | PFT    | 34.6    | 0.7  | 175                     | 175                     | 63                 |
| 2ks4                | Sticholysin I                        | PFT    | 22.5    | 2.0  | 176                     | 172                     | 61                 |
| 4jox                | Insecticidal protein cry34Ab1        | PFT    | 14.3    | 1.5  | 118                     | 112                     | 18                 |
| 4oeb                | Pleurotolysin A                      | PFT    | 11.4    | 2.4  | 135                     | 116                     | 14                 |
| 3qdx <sup>[d]</sup> | <i>Boletus edulis</i> lectin         | Lectin | 11.2    | 2.5  | 142                     | 123                     | 11                 |
| 1x99                | <i>Xerocomus chrysenteron</i> lectin | Lectin | 11      | 2.7  | 143                     | 125                     | 13                 |
| 2ofd <sup>[d]</sup> | <i>Sclerotium rolfsii</i> lectin     | Lectin | 10.9    | 2.7  | 141                     | 124                     | 11                 |
| 3a57                | Thermostable direct hemolysin        | PFT    | 10.5    | 3.3  | 154                     | 131                     | 4                  |
| 1y2v <sup>[d]</sup> | <i>Agaricus bisporus</i> lectin      | Lectin | 10.5    | 2.6  | 143                     | 122                     | 12                 |

[a] Number of residues.

[b] Number of structurally equivalent residues.

[c] Percentage of identical amino acids among structurally equivalent residues.

[d] Structures with sugars found.

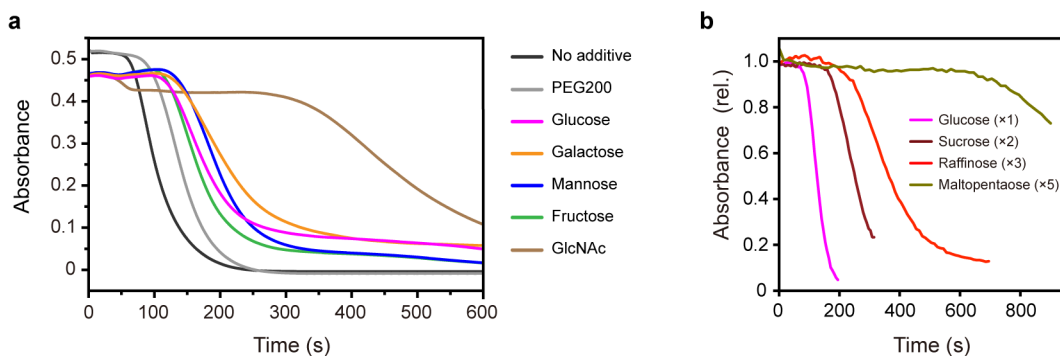

**Figure S1. Kinetics of hemolysis by FraC in the presence of saccharides. (a)** Inhibitory effect of various monosaccharides. The hemolytic toxin was added at a final concentration of 25 nM. The concentration of PEG200 (gray) and monosaccharides glucose (magenta), galactose (orange), mannose (blue), fructose (green), or GlcNAc (light brown) was 400 mM. **(b)** Influence of the number of hexoses of the saccharide on the kinetics of hemolysis. Data for glucose (one unit, magenta), sucrose (two units, brown), raffinose (three units, red) and maltopentaose (five units, olive) are shown.

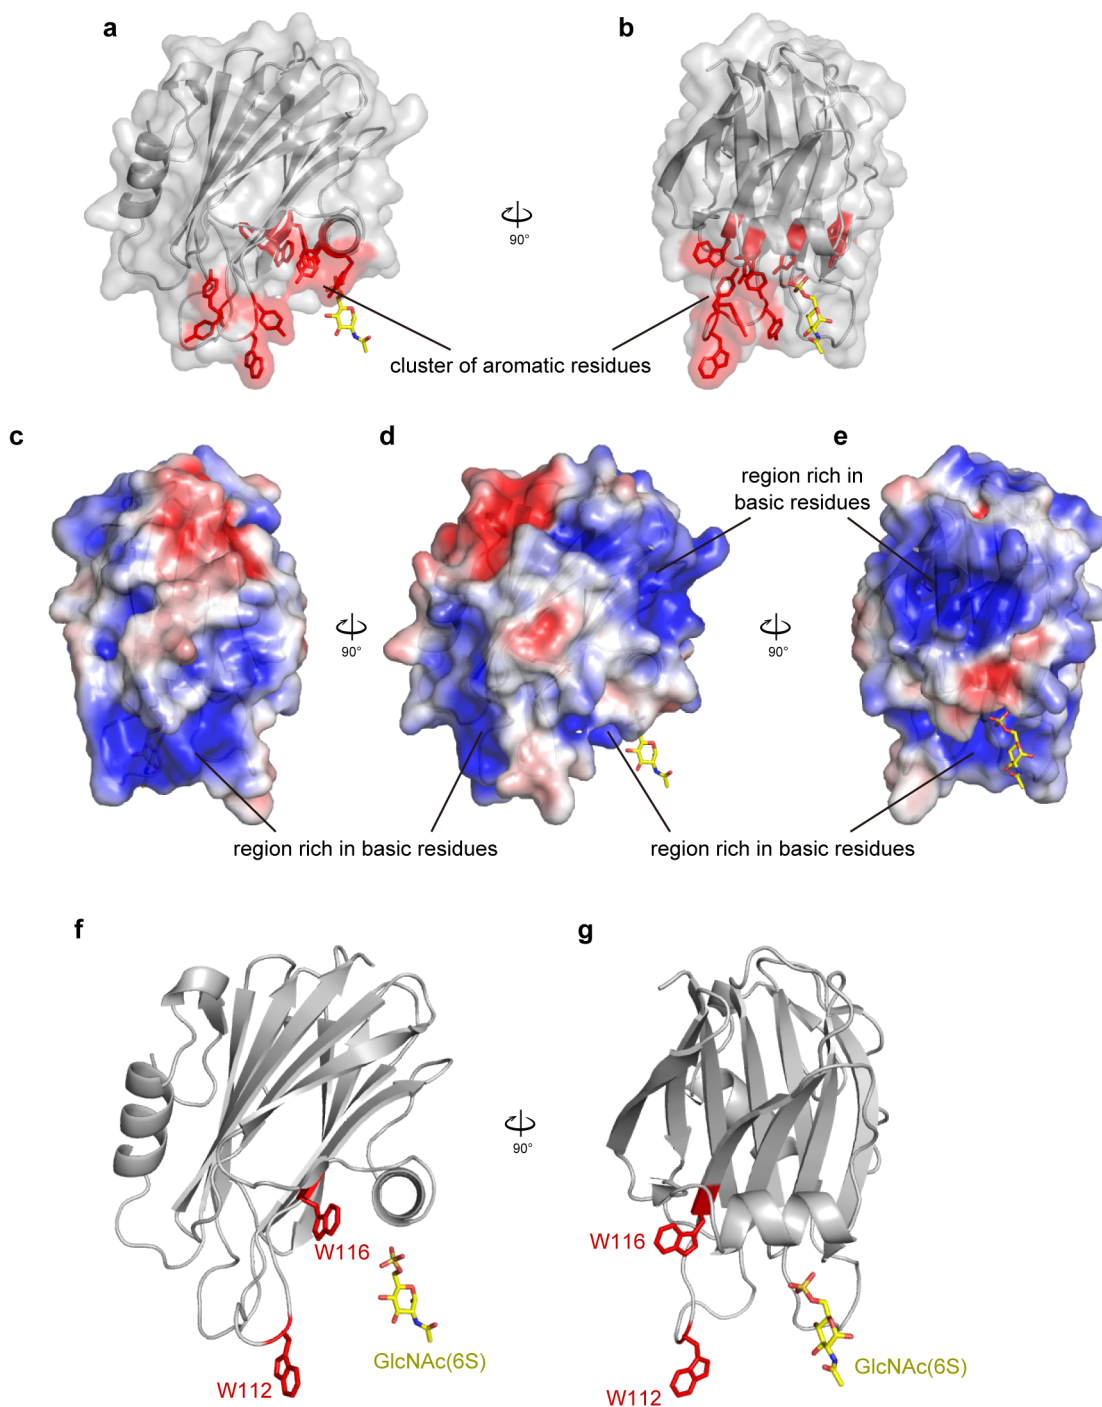

**Figure S2. Depiction of the lipid/carbohydrate binding region of FraC.** (a, b) The cluster of aromatic residues of FraC are colored in red. (c-e) Electrostatic potential of FraC. The color gradient set from red to blue represents negative (-3 kT/e) to positive (+3 kT/e) electrostatic potentials. (f, g) Location of residues W112 and W116 with respect to the sugar GlcNAc(6S).
